# Supplementary material
Source: PubMed Central journal article supplement (PMC5449232)
Supplement: NIHMS822539-supplement-supplement_1.pdf [file NIHMS822539-supplement-supplement_1.pdf]

**Tables**

| <b>Table S1. Quantitative verbal interaction items</b>                                                                                                                                         |
|------------------------------------------------------------------------------------------------------------------------------------------------------------------------------------------------|
| <i>If you have a spouse or partner, how much time on average do you spend in face-to-face conversations with them each <b>day</b>?</i>                                                         |
| <i>How much time on average do you spend in face-to-face conversations with family members other than your spouse or partner each <b>week</b>?</i>                                             |
| <i>How much time on average do you spend in face-to-face conversations with close friends each <b>week</b>?</i>                                                                                |
| <i>When you go to religious services or church, how much time <b>at each service</b> do you spend in face-to-face conversations with other people?<sup>a</sup></i>                             |
| <i>When you go to a meeting of a club, lodge, or parent group, how much time <b>at each meeting</b> do you spend in face-to-face interactions with other people?<sup>b</sup></i>               |
| <i>How much time on average do you spend in face-to-face conversations with colleagues <b>each day</b> that you work?</i>                                                                      |
| <i>How much time on average do you spend in face-to-face conversations with strangers or people you don't know very well <b>each week</b> (e.g., doctors, waitresses, store clerks, etc.)?</i> |

*a* A prior question quantifies the number of times per month a participant attends religious services or church; this information was used in our calculation of total interaction quantity.

*b* A prior question quantifies the number of times per month a participant attends such meetings; this information was used in our calculation of total interaction quantity.
